# Supplementary material for: Experiences of Austrian mothers with mobility or sensory impairments during pregnancy, childbirth and the puerperium: a qualitative study
Source: Springer Nature journal article supplement (doi:10.1186/s12884-017-1388-3), 2017-06-26
Supplement: MOESM1 [file 12477216]

## **Semi-structured Interview Guide:**

### **Initial conversation and general information:**

- ✓ Introduce oneself / welcome
- ✓ Thank participant to volunteer for interview
- ✓ Explain intention of interview
- ✓ Information on guaranteed anonymity
- ✓ Information and participant's consent on recording and transcription
- ✓ Information that participant can oppose to answer questions and are allowed to ask questions at any time
- ✓ Information on timeframe of approximately 45 – 60 minutes

### **1. You are mother of X children. In what way do you think, your everyday family life differs from that of other families?**

- a. Household help? (Housecleaner, family assistant, relatives, ...)
- b. Help / assistance with childcare?

### **2. How did you experience pregnancy / pregnancies?**

- a. Getting to know you were pregnant?
- b. Reactions from social environment?
- c. Individual experience?
- d. Support during pregnancy? (if yes – by whom?)
- e. How did you prepare yourself for birth?

### **3. How did you experience childbirth?**

- a. Duration?
- b. Mode of delivery (vaginal / cesarean)?
- c. What was important during childbirth?
- d. What was helpful during childbirth?
- e. Who was present?
- f. Were your needs sufficiently responded to by present persons?
- g. Was there something bothering?
- h. What happened immediately after childbirth / did your child remain with you?

### **4. How did you experience the first couple of weeks after childbirth?**

- a. How did you experience first time after birth?
- b. Support after childbirth?
- c. Duration of hospital stay?
- d. Support appropriate and adequate?
- e. Support in care for newborn baby?
- f. Support in restructuring everyday life with the baby?

### **5. In what manner could care for women with disabilities be optimized?**

- a. Structural conditions and equipment
- b. Structural processes
- c. Care and support
